# Supplementary material
Source: PubMed Central journal article supplement (PMC4529747)

## **Supplemental Experimental Procedures**

### ***Animals***

The targeting construct harboring mutations in the miR-155 target site in the 3' UTR of the SOCS1 gene was generated using recombineering. For detailed information see the National Cancer Institute recombineering website

(<http://redrecombineering.ncifcrf.gov/>). Mice on a B6 genetic background with the germ-line transmission were bred to Cre deleter mice to remove the neomycin resistance cassette. miR-155<sup>KO</sup> and C57BL/6J mice were purchased from the Jackson Laboratories. SOCS1<sup>fl</sup> mice and Klra8<sup>KO</sup> (Ly49H-deficient) mice were kindly provided by A. Yoshimura and S. Vidal, respectively. All the mice were bred and housed in the specific-pathogen-free animal facility at the Memorial Sloan-Kettering Cancer Center and used in accordance with institutional guidelines.

### ***EAE***

Mice were immunized s.c. with 100µg MOG<sub>35-55</sub> emulsified with complete Freund's adjuvant plus 200ng pertussis toxin in 500ul PBS. Animals were monitored 3 times a week for disease symptoms until the experiment terminated, usually 25 days post induction and classified into one of five grades of severity: grade 1 - no tail tone and the tail drops when the mouse is picked up by the base of the tail; grade 2 - tail drop and weakness in the rear limbs, usually evident by an uneven gait; grade 3 - rear limb paralysis; grade 4 - rear limb paralysis and weakness in the forelimbs; grade 5 - moribund. In some experiments, mice were harvested at the peak of the disease (~14 days after EAE induction) followed by FACS analysis.

### ***In Vitro T cell Proliferation and Th17 Polarization Assays***

To measure the recall response to MOG antigen, splenic CD4<sup>+</sup> T cells from mice subjected to EAE induction were co-cultured with CD11c bead-sorted DCs pulsed with different concentrations of MOG<sub>35-55</sub> peptides for 3 days. T cell proliferation was

assessed by with  $^3\text{H}$ -TdR incorporation (cpm) in triplicate during the last 8 hr of culture. For *in vitro* Th17 polarization assay, FACS sorted  $\text{CD4}^+\text{CD25}^-\text{CD62L}^{\text{hi}}$  naïve T cells ( $2 \times 10^5$ ) were stimulated with  $\alpha\text{CD3}$  ( $1 \mu\text{g/ml}$ ) in the presence of irradiated T cell-depleted splenocytes ( $1 \times 10^6$ ) as APCs plus  $\text{TGF}\beta$  ( $2\text{ng/ml}$ ) and IL-6 ( $20\text{ng/ml}$ ) for 4 days. IL-17 production was assessed by intracellular FACS analysis.

### ***Quantitative PCR and Gene Expression Profiling Analysis***

Total RNA was extracted with TriZOL reagent (Invitrogen) from FACS-purified cells. cDNA was synthesized with Superscript III Reverse Transcriptase (Invitrogen), followed by real-time PCR analysis (SYBR green; Applied Biosystems).

For gene expression profiling analysis,  $\text{CD45.2}^+$   $\text{miR-155}^{\text{KO}}$  or  $\text{SOCS1}^{\text{KI}}$  or WT OT-1 TCR-tg  $\text{CD8}^+$  T cells or NK cells were adoptively transferred into  $\text{CD45.1}^+$  WT or Ly49H-deficient hosts, respectively, prior to infection with MCMV-OVA or MCMV. OT-1  $\text{CD8}^+$  T cells or Ly49H $^+$  NK cells were FACS-sorted on d4 post infection and poly-A RNA-sequencing was performed using 3 biological replicates for each cell type analyzed using an Illumina HiSeq2500 platform. Genes with  $\text{FDR} < 5\%$  and the absolute value of  $\log_2$  fold change more than 0.75 under both conditions were considered as similarly regulated in  $\text{miR-155}^{\text{KO}}$  and  $\text{SOCS1}^{\text{KI}}$  cells compared to WT controls, while genes with  $\text{FDR} < 5\%$  in only one condition and absolute value of  $\log_2$  fold change less than 0.75 in the other condition were considered as  $\text{miR-155}^{\text{KO}}$  specific or  $\text{SOCS1}^{\text{KI}}$  specific. Each type of regulated genes can be further separated into up-regulated and down-regulated categories based on the direction of regulation. RNA-sequencing data are available from NCBI under accession number [GSE68511](#).

**Figure S1 (related to Figure 1). Generation of mice harboring mutations in the putative miR-155 target site in the 3' UTR of the SOCS1. Schematic representation of the SOCS1 targeting strategy.**

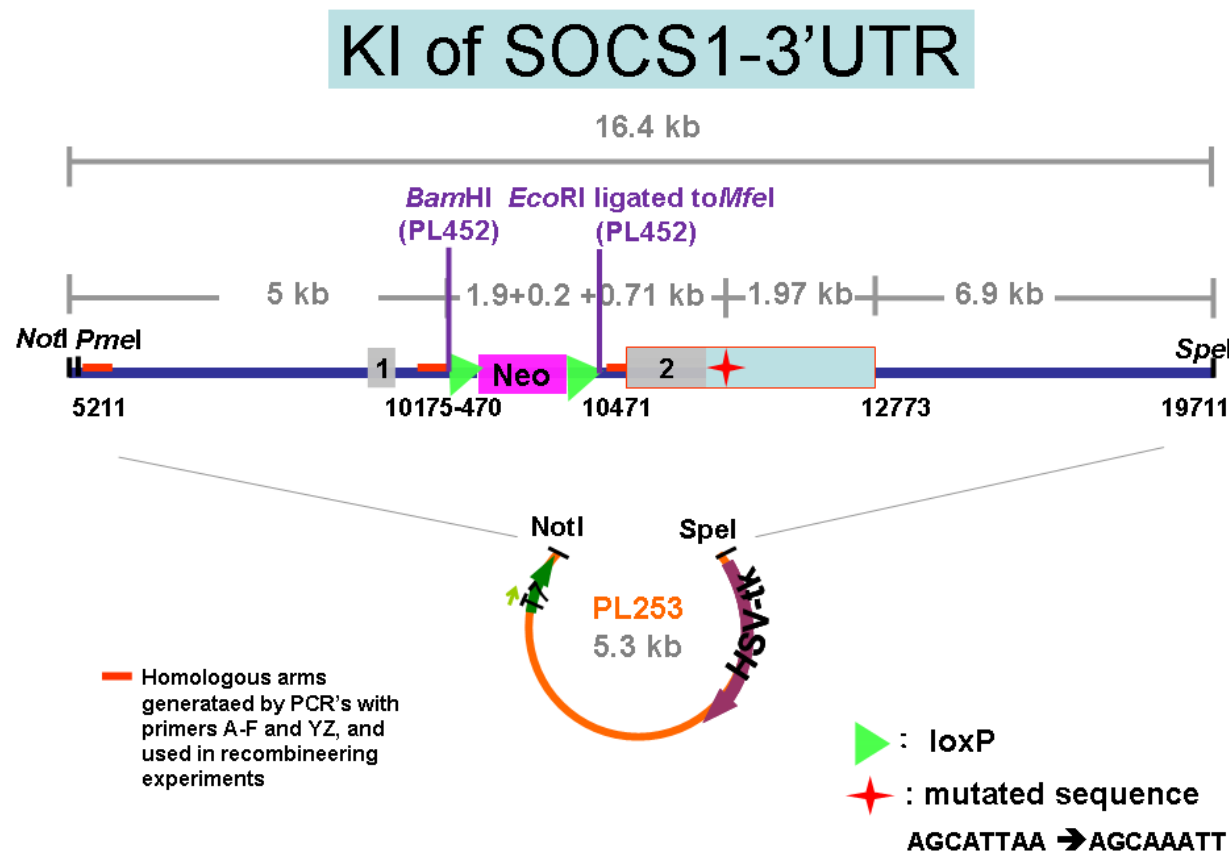

**Figure S2 (related to Figure 1). Specific disruption of miR-155-mediated regulation of SOCS1 by mutations in the 3' UTR of the *Socs1* gene. (A)** Retroviral miR-155, miR-19 or empty vectors equipped with a GFP reporter were expressed in T cells from SOCS1<sup>KI</sup>, miR-155<sup>KO</sup> or WT mice. GFP<sup>+</sup> cells were sorted 4 days after retroviral transduction and the amounts of SOCS1 were assessed. **(B)** Relative reductions in SOCS1 protein amounts in T cells overexpressed with different miRNAs compared to corresponding T cell populations with empty vector transduction were shown. The data are representative of 2 independent experiments (n = 2).

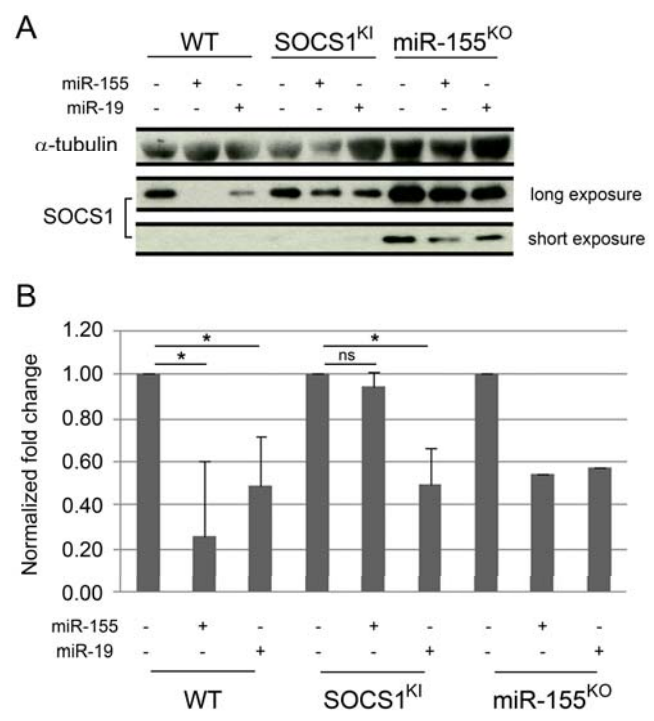

**Figure S3 (related to Figure 2). SOCS1 deficiency does not rescue reduced miR-155<sup>KO</sup> Treg cell numbers.** FACS analysis of **(A)** thymus and **(C)** spleen from WT, miR-155<sup>KO</sup>, *Foxp3*<sup>cre</sup>SOCS1<sup>fl/fl</sup> (SOCS1<sup>ckO</sup>) or miR-155<sup>KO</sup>SOCS1<sup>ckO</sup> (DKO) mice. **(B,D)** Cellularity of the thymus and spleen and the proportion and absolute numbers of thymic and splenic Foxp3<sup>+</sup>CD4<sup>+</sup> T cells in indicated mice are shown. The data are shown as mean ± SD and are representative of 4 independent experiments (n = 5–12).

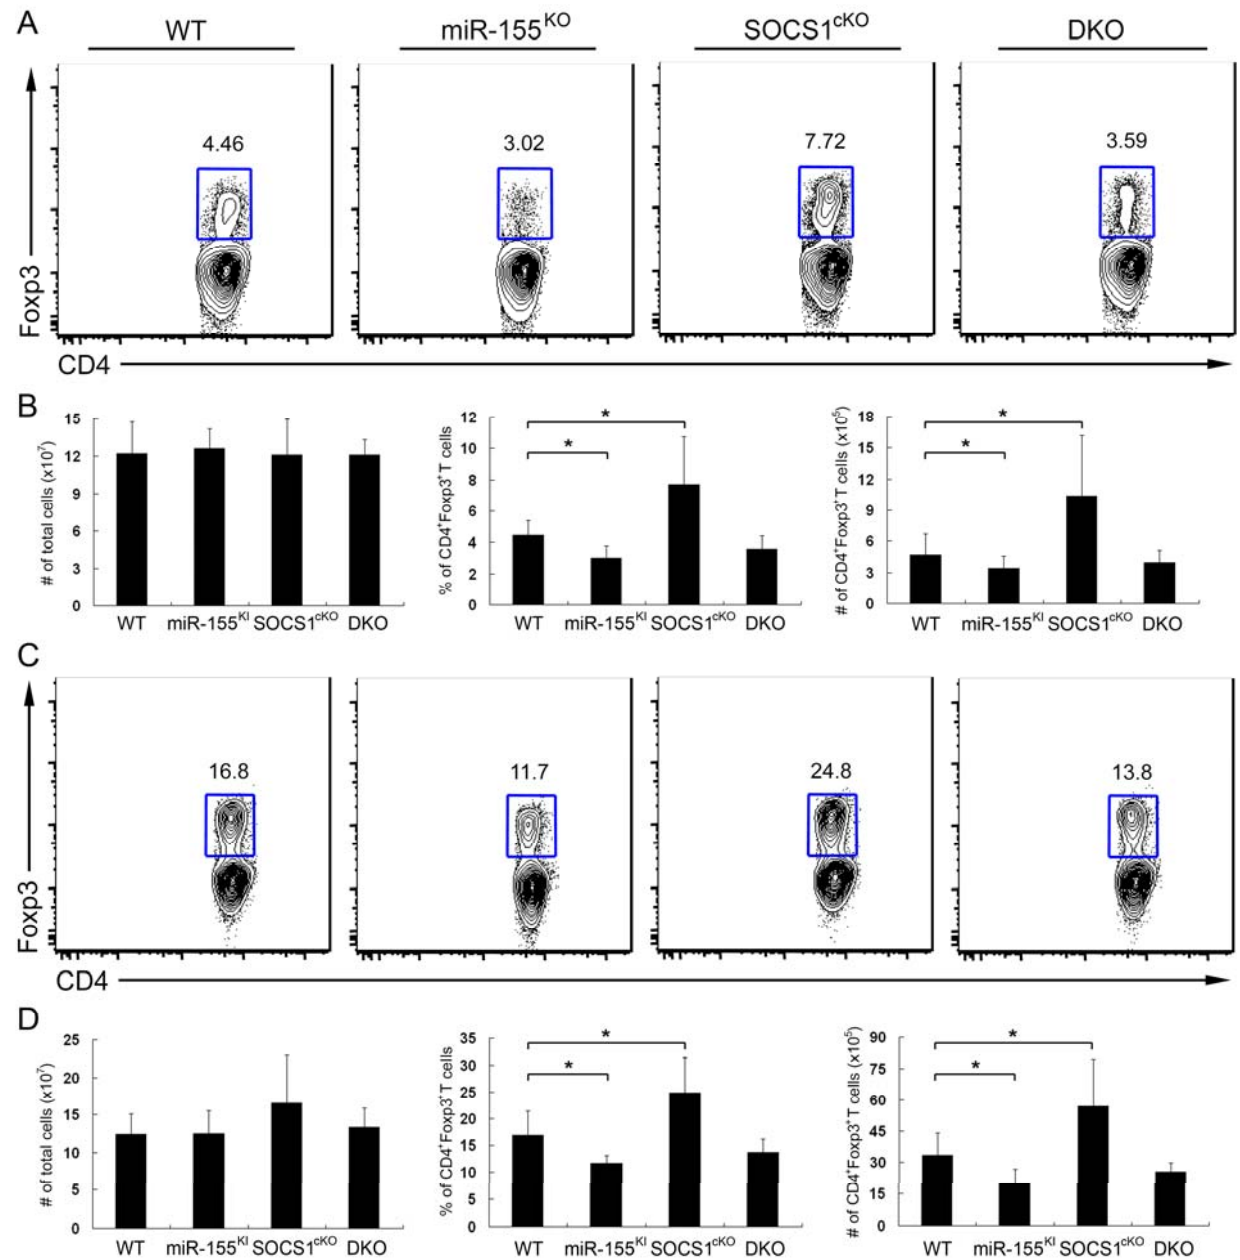

**Figure S4 (related to Figure 4). Comparable production of proinflammatory cytokines by SOCS1<sup>KI</sup> DCs.** qPCR analysis of IL-6 expression in CD11c+ DCs isolated from WT, SOCS1<sup>KI</sup> or miR-155<sup>KO</sup> mice in the presence or absence of LPS stimulation. The data are shown as mean  $\pm$  SD and are pooled of 4 independent experiments (n = 7–8).

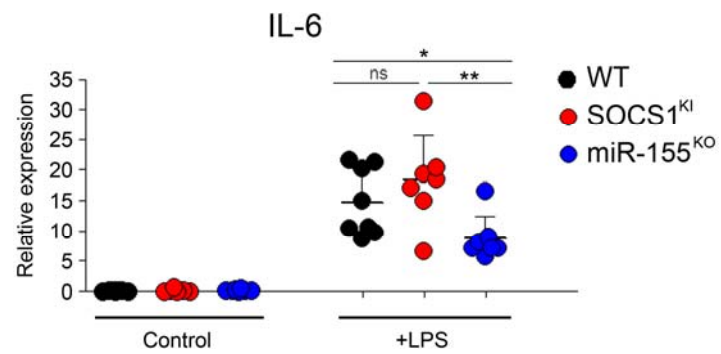

**Figure S5 (related to Figure 4). Lack of miR-155-mediated SOCS1 regulation did not diminish Th17 polarization *in vitro*.** CD4<sup>+</sup>CD25<sup>-</sup>CD62L<sup>hi</sup> naive T cells isolated from WT, SOCS1<sup>KI</sup> and miR-155<sup>KO</sup> mice were cultured *in vitro* under Th17 polarizing condition. **(A)** FACS analysis and **(B)** frequencies of IL-17<sup>+</sup> in CD4<sup>+</sup> T cells were shown. The data are shown as mean  $\pm$  SD and are representative of three independent experiments (n = 9).

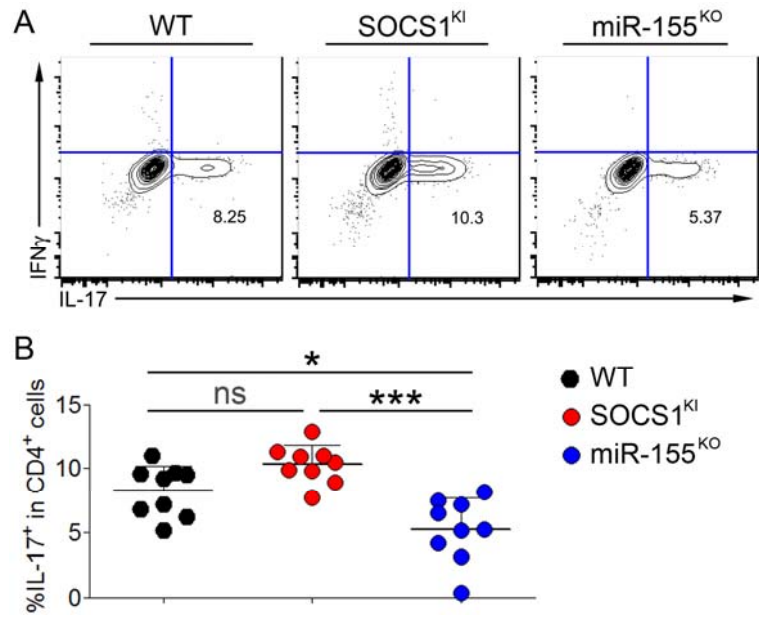

**Figure S6 (related to Figure 7). Severe defect of miR155-deficient T cell response in both acute and chronic LCMV infection.** CD45.2<sup>+</sup> miR-155<sup>KO</sup> or SOCS1<sup>KI</sup> and CD45.1<sup>+</sup>/CD45.2<sup>+</sup> naïve CD8<sup>+</sup> P14 TCR-tg T cells (10<sup>4</sup> each) were cotransferred into CD45.1<sup>+</sup> wt hosts prior to infection with LCMV Armstrong (Arm) or Clone 13. Figure shows representative FACS plots and ratios of P14 T cells on d8 pi.

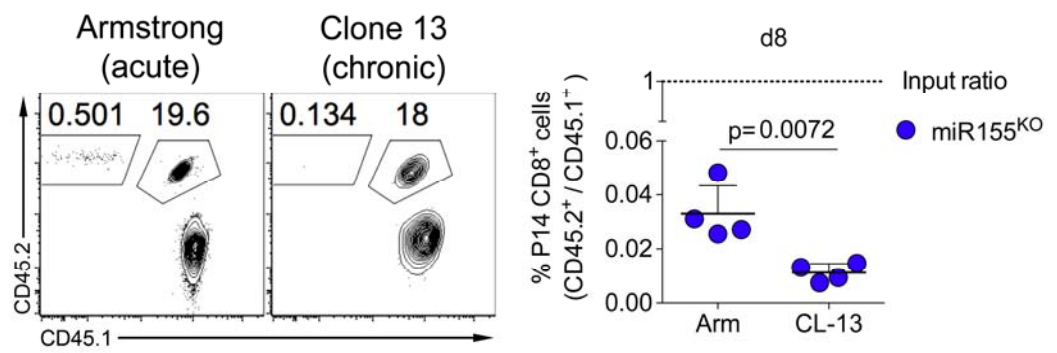

**Figure S7 (related to Figure 7)..Unimpeded terminal differentiation and memory inflation of MCMV-specific SOCS1<sup>KI</sup> T cells.**  
Mixed BM chimeras were infected with MCMV and MCMV-m38 tetramer binding CD8<sup>+</sup> T cells were analyzed on d40 pi for expression of differentiation markers CD127 and KLRG-1

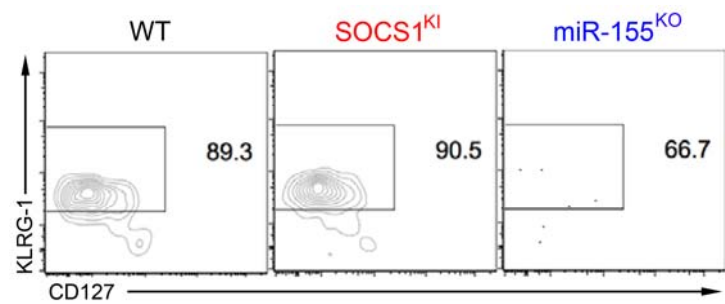

Supplement: NIHMS707445-supplement.pdf [file NIHMS707445-supplement.pdf]
